# Supplementary material for: Activation of Atg7-dependent autophagy by a novel inhibitor of the Keap1–Nrf2 protein–protein interaction from Penthorum chinense Pursh. attenuates 6-hydroxydopamine-induced ferroptosis in zebrafish and dopaminergic neurons
Source: Royal Society of Chemistry journal article supplement (doi:10.1039/d2fo00357k), 2022-01-01
Supplement: d2fo00357k1.pdf [file d2fo00357k1.pdf]

1 **Article title:** Activation of Atg7-dependent autophagy by a novel inhibitor of the  
2 Keap1-Nrf2 protein-protein interaction from *Penthorum chinense* Pursh. attenuates 6-  
3 hydroxydopamine-induced ferroptosis in zebrafish and dopaminergic neurons  
4 **Journal name:** Food & Function  
5 **Author names:** Yiran Sun, Libo He, Wang Wang, ZhishenXie, Xiaowei Zhang,  
6 PanWang, Lan Wang, Chenchen Yan, Zhiwen Liu, JieZhao, Zhenghao Cui, Yida  
7 Wang, Lin Tang, Zhenqiang Zhang  
8 **Affiliation and e-mail address of the corresponding author:**  
9 Zhenqiang Zhang  
10 Academy of Chinese Medical Sciences, Henan University of Chinese Medicine,  
11 Zhengzhou 450046, P.R. China,  
12 e-mail: zhang\_zhenqiang@126.com;  
13 Lin Tang  
14 Key Laboratory of Bio-Resources and Eco-Environment of Ministry of Education  
15 College of Life Sciences, Sichuan University, Chengdu, China  
16 e-mail: [tanglin@scu.edu.cn](mailto:tanglin@scu.edu.cn)  
17  
18  
19  
20  
21

## 22 The homo siRNAs sequences

**Table S1 The homo siRNAs sequences**

| Primer name (orientation) | Sequences             |
|---------------------------|-----------------------|
| Nrf2-sense                | GGAACAGAUGGAGUCGGAUTT |
| Nrf2-antisense            | AUCCGACUCCAUCUGUUCCTT |
| HO-1-sense                | GGGUGAUAGAAGAGGCCAATT |
| HO-1-antisense            | UUGGCCUCUUCUAUCACCCTT |
| Keap1-sense               | CCAGATGCTATCTTTGGGGA  |
| Keap1-antisense           | UUGACCAGGUAGUCCUUGCTT |
| p62-sense                 | GGAACAGAUGGAGUCGGAUTT |
| p62-antisense             | AUCCGACUCCAUCUGUUCCTT |
| Atg7-sense                | GCGUGAGACACAUCACATT   |
| Atg7-antisense            | UGUGAUGUGUCUCACGCTT   |

23

24

25

26

27

28

29

30

31

32

33

34

35

36

37

### 38 The detailed docking information

39 **Table S2. The docking detailed information between Keap1 kelch domain and twelve main**  
40 **compounds of *Penthorum chinense* Pursh**

| Molecules | Docking scores (kcal/mol) |
|-----------|---------------------------|
| Th A      | -158.04                   |
| PHG       | -151.83                   |
| PGHG      | -150.76                   |
| QUE       | -109.41                   |
| ISQ       | -108.53                   |
| KAE       | -107.36                   |
| EA        | -103.04                   |
| CAT       | -101.20                   |
| AST       | -100.84                   |
| BCA       | -99.56                    |
| EPI       | -97.34                    |
| GA        | -78.90                    |

41

#### 42 **Note:**

43 **Th A: thoningianin A; PHG: Pinocembrin-7-O-[4'',6''-hexahydroxydiphenoyl]-glucoside;**

44 **PGHG:Pinocembrin-7-O-[3''-O-galloyl-4'',6''-(S)-hexahydroxydiphenoyl]- $\beta$ -D-glucoside;**

45 **QUE: quercetin; ISQ: isoquercitin; KAE: kaempferol; EA: ellagic acid; CAT: catechin;**

46 **AST: astragalin; BCA: brevifolin carboxylic acid; EPI: epicatechin**

#### 47 **Reagents**

48 CCK-8 kit, Thoningianin A (Th A), Zn-protoporphyrin (ZnPP), and Brusatol

49 were bought from Meilun Biotechnology (Dalian, China). JC-10 fluorescence probe

50 was bought from Solarbio Life Science (Beijing, China). Immunoprecipitation kit was

51 bought from Proteintech Group, Inc (Wuhan, China). Liperfluo and FerroOrange were

52 bought from Dojindo Lab (Kumamoto, Japan). Lactate Dehydrogenase (LDH),

53 Maleicdialdehyde (MDA), glutathione (GSH), and DCFH-DA assay kits were bought  
54 from Nanjing Jiancheng Bioengineering Institute (Nanjing, China). Ferrostatin-1 (Fer)  
55 were bought from Topscience (China, Shanghai). Bicinchoninic acid (BCA) Protein  
56 Quantification Kit was bought from Thermo Scientific (Madison, USA). Dulbecco's  
57 modified Eagle's medium (DMEM) medium was bought from HyClone Laboratories  
58 (Logan, USA). Fetal bovine serum was purchased from CELL-BOX Biological  
59 Products (HK). TransIntro™ EL Transfection Reagent was bought from TransGen  
60 Biotech (Beijing, China). Radio-Immunoprecipitation Assay (RIPA) cell lysis buffer,  
61 Nuclear and Cytoplasmic Extraction Kit were bought from CWBIO (Beijing, China).  
62 Antibodies against Acyl-CoA synthetase long-chain family member4 (ACSL4,  
63 Abways, CY10198, 1:1000), FITC Fluorescent Secondary Antibody Conjugates,  
64 Transferrin (Abways, CY5396, 1:1000), Atg7 (Abways, CY5658, 1:10000), LC3B  
65 (Abways, CY5992, 1:1000), Beclin1 (Abways, CY5092, 1:1000), GPX4 (Abways,  
66 CY6959, 1:1000), Nrf2 (Abways, CY5136, 1:1000),  $\alpha$ -syn (Affinity Biosciences,  
67 AF0402, 1:1000), HO-1 (Abways, CY5113, 1:1000), GAPDH (Abways, AB0036,  
68 1:5000),  $\beta$ -Actin (Affinity Biosciences, AF7018, 1:5000) were bought from Abways  
69 Technology or Affinity Biosciences. Antibodies against p62 (18420-1-AP, 1:2000),  
70 Keap1 (10503-2-AP, 1:3000), Lamin B1 (12987-1-AP, 1:3000) were bought from  
71 Proteintech Group, Inc (Wuhan, China).

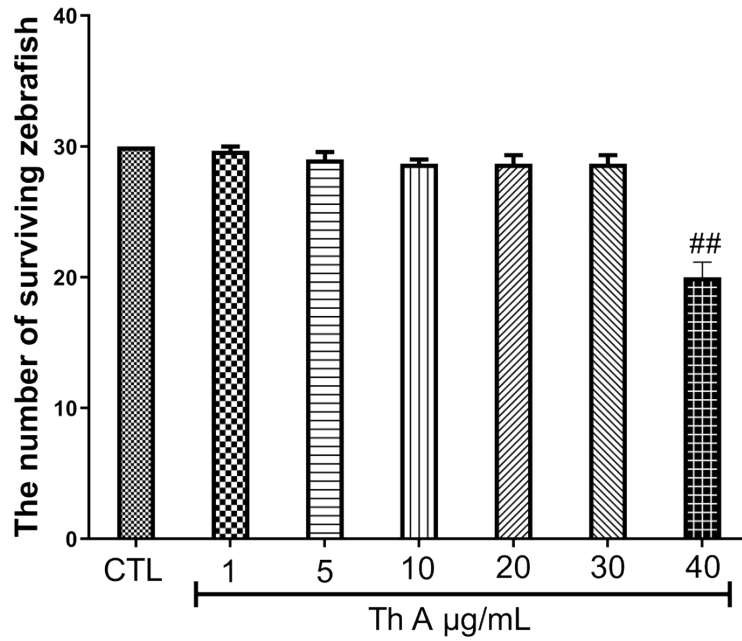

72

73 Fig.S1 Toxicity assay of zebrafish induced by Th A. 4 dpf of zebrafish larvae were

74 treated with Th A(1-40 µg/mL) for 2 days. Then, The number of survival

75 Zebrafish was recorded. The values are shown as the means ± SEM, n = 3 for

76 each group; ##*p* < 0.01 versus CTL.
